# Supplementary material for: Altered S-nitrosylation of p53 is responsible for impaired antioxidant response in skeletal muscle during aging
Source: PubMed Central journal article supplement (PMC5270679; doi:10.18632/aging.101139), 2016-12-20
Supplement: aging-08-3450-s001.pdf [file aging-08-3450-s001.pdf]

## SUPPLEMENTARY MATERIALS

**Supplementary Table S1. List of primers used for ChIP analysis and Oligo-pull-down assay.**

| Genes                       | Sequence                                                                                                                                                                                                           |
|-----------------------------|--------------------------------------------------------------------------------------------------------------------------------------------------------------------------------------------------------------------|
| <i>mppargc1a</i><br>(-2317) | FW 5'-GCGAGGTTTCTGCTTAGTCA-3'<br>RV 5'-ACAATGACTAAGCAGAAACCTCG-3'                                                                                                                                                  |
| hPPARGC1A<br>(-1237)        | FW 5'-TGTCTGTGAACTGAGGGAAAAA-3'<br>RV 5'-AGGGCTAATGCAGGTAGGTG-3'                                                                                                                                                   |
| mMuRF-1<br>(-351)           | FW 5'-GAGCCGCGGGCGCCTCGGAAAAC-3'<br>RV 5'-AGAGCAGGCTGAGGACATGTGAAAG-3'                                                                                                                                             |
| mAtrogin-1                  | Atrogin-1 agccgCATGgccaggccagatgcc -319<br>Atrogin-1 gatcgtggcctttcaCATGtctca +31<br>Atrogin-1 agagCAGGctgaggacatgtgaaag -40<br>Atrogin-1 acccCAAGgtccctacaagtccca -82<br>Atrogin-1 atatgaggctctggcCATGacctaa -519 |
| hPPARGC1A<br>(-1237)        | 5'-(btn)AACATGTTTATTTCACACAGA-3'<br>5'-(btn)TCTGTGTGAATAAACATGTT-3'                                                                                                                                                |
| <i>mppargc1a</i><br>(-2317) | 5'-(btn)CTCTAAATAAAAAATGTTATAC-3'<br>5'-(btn)GTATAACATTTTTTATTTAGAG-3'                                                                                                                                             |

**Supplementary Table S2. List of primers used for RT-qPCR analysis.**

| Genes              | Sequences                      |
|--------------------|--------------------------------|
| mAtrogin-1 FW      | 5'-GCGACCTTCCCAACGCCTG-3'      |
| mAtrogin-1 RV      | 5'-GGCGACCGGGACAAGAGTGG-3'     |
| mCGLC FW           | 5'-CGCACAGCGAGGAGCTTCGG-3'     |
| mCGLC RV           | 5'-CTCCACTGCATGGGACATGGTGC-3'  |
| hCGLC FW           | 5'-AGGAGCGAGGACTGGAGCCAT-3'    |
| hCGLC RV           | 5'-GCAACATGCTGGGCCAGGAGA-3'    |
| mMuRF-1 FW         | 5'-AGGGGCTACCTTCTCTAAGTG-3'    |
| mMuRF-1 RV         | 5'-TCTTCCCAGCTGGCAGCCC-3'      |
| mMyoD FW           | 5'-GGGGCCGCTGTAATCCATCATGC-3'  |
| mMyoD RV           | 5'-GGAGATCCTGCGCAACGCCA-3'     |
| mNFE2L2 FW         | 5'-TCCGCCAGCTACTCCCAGGTTG-3'   |
| mNFE2L2 RV         | 5'-TGGGCCTGATGAGGGGCAGTG-3'    |
| hNFE2L2 FW         | 5'-ACAGGAGGAGGAAGTGGAGGGACT-3' |
| hNFE2L2 RV         | 5'-TCAGCTGGCGCGTAGGTTTGT-3'    |
| mPAX-7 FW          | 5'-TTCGATTAGCCGAGTGCTCA-3'     |
| mPAX-7 RV          | 5'-ATCCAGACGGTTCCTTTG-3'       |
| mPGC-1 $\alpha$ FW | 5'-ACTGCAGGCCTAACTCCTCCCAC-3'  |
| mPGC-1 $\alpha$ RV | 5'-CCCTCTTGTTGGCGGTGGC-3'      |

|                    |                                 |
|--------------------|---------------------------------|
| hPGC-1 $\alpha$ FW | 5'-ACTGCAGGCCTAACTCCACCCA-3'    |
| hPGC-1 $\alpha$ RV | 5'-ACTCGGATTGCTCCGGCCCT-3'      |
| mRPL FW            | 5'-GTACGACCACCACCTTCCGGC-3'     |
| mRPL RV            | 5'-ATGGCGGAGGGGCAGGTTCTG-3'     |
| hRPL FW            | 5'-GGCGGACCGTGCGAGGTATG-3'      |
| hRPL RV            | 5'-GGCGGTGGGATGCCGTCAAA-3'      |
| mSOD2 FW           | 5'-GTGTCTGTGGGAGTCCAAGG-3'      |
| mSOD2 RV           | 5'-AGCGGAATAAGGCCTGTTGT-3'      |
| hSOD2 FW           | 5'-GCAAGGAACAACAGGCCTTA-3'      |
| hSOD2 RV           | 5'-AAGAGCTTAACATACTCAGCATAAC-3' |
| mp21 FW            | 5'- CAGAATAAAAGGTGCCACAGGC-3'   |
| mp21 RV            | 5'- CGTCTCCGTGACGAAGTCAA-3'     |

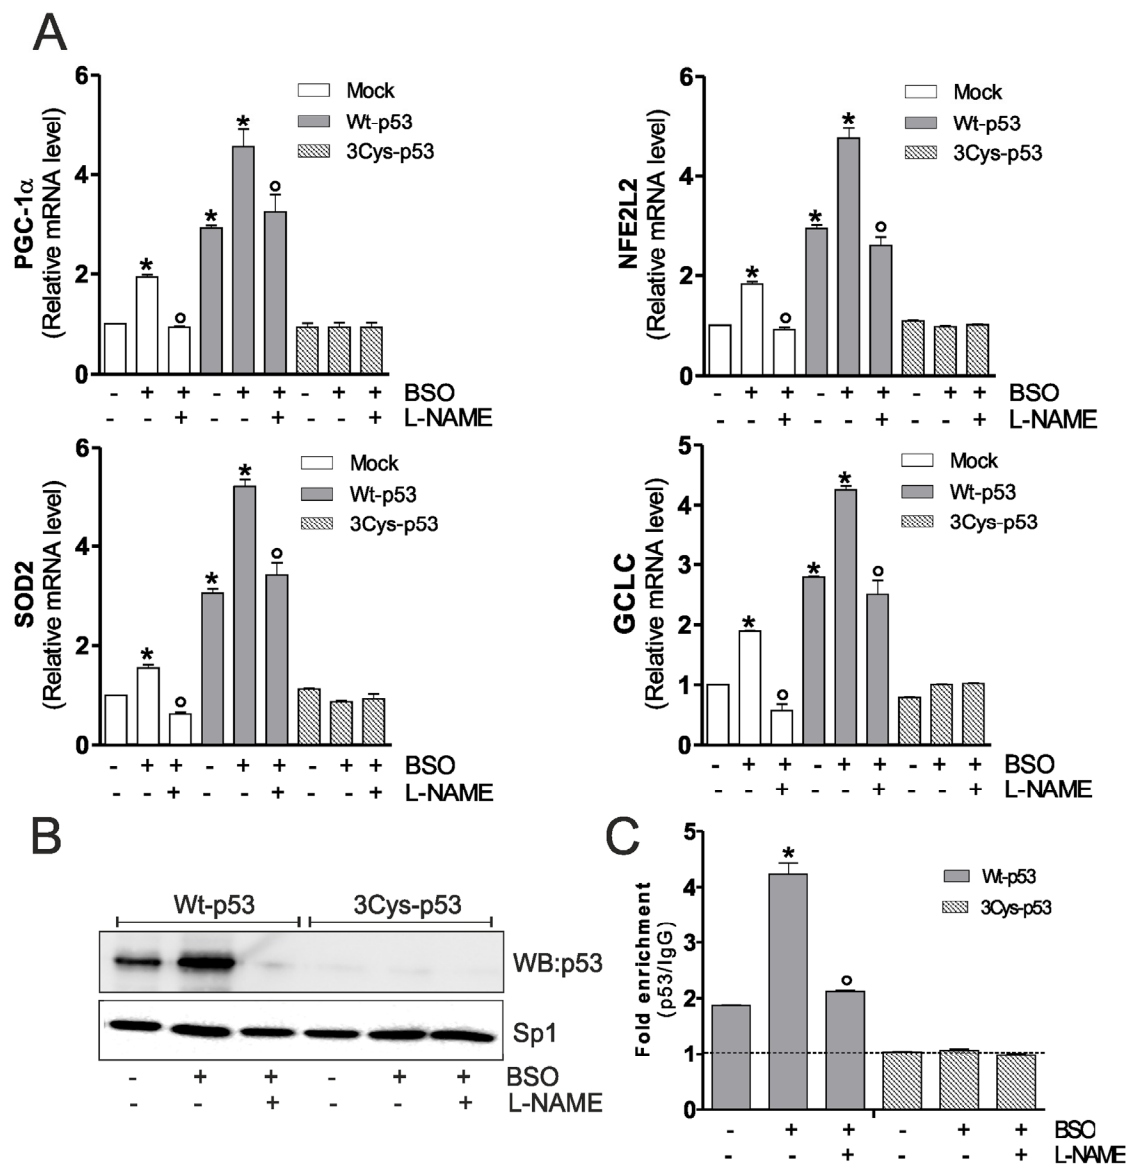

**Supplementary Figure S1. 3Cys-p53 mutant impairs NO/PGC-1 $\alpha$ -mediated antioxidant response in C2C12 myoblasts.** (A) C2C12 myoblasts were transfected with pcDNA3.1 vector containing cDNA for wild type p53 (Wt-p53), triple p53 mutant in DBD (C277S, C275S and C124S) (3Cys-p53) or with empty vector (Mock). After 15 h from transfection myoblasts were treated with 1 mM BSO for 24 h. L-NAME (100  $\mu$ M) was added 1 h before BSO treatment (15 h) and maintained throughout the experiment. Total RNA was isolated and relative mRNA levels of PGC-1 $\alpha$ , NFE2L2, SOD2 and GCLC were analyzed by RT-qPCR. Data are expressed as means  $\pm$  S.D. (n=5; \*p<0.001 vs Mock; <sup>o</sup>p<0.01 vs BSO-treated cells). (B) Nuclear protein extracts (500  $\mu$ g) were subjected to oligo-pull-down by using the biotinylated oligonucleotide representing the p53RE on the *ppargc1a* promoter and bound p53 was detected by Western blot. Twenty  $\mu$ g of nuclear proteins (input) were used for Western blot analysis of Sp1. (C) ChIP assay was carried out on cross-linked nuclei from Wt-p53 and 3Cys-p53 cells, using p53 antibody followed by qPCR analysis of p53RE. Dashed line indicates the value of IgG control. Data are expressed as means  $\pm$  S.D. (n=4; \*p<0.001 vs Mock; <sup>o</sup>p<0.001 vs BSO-treated cells). All the immunoblots reported are from one experiment representative of four that gave similar results.

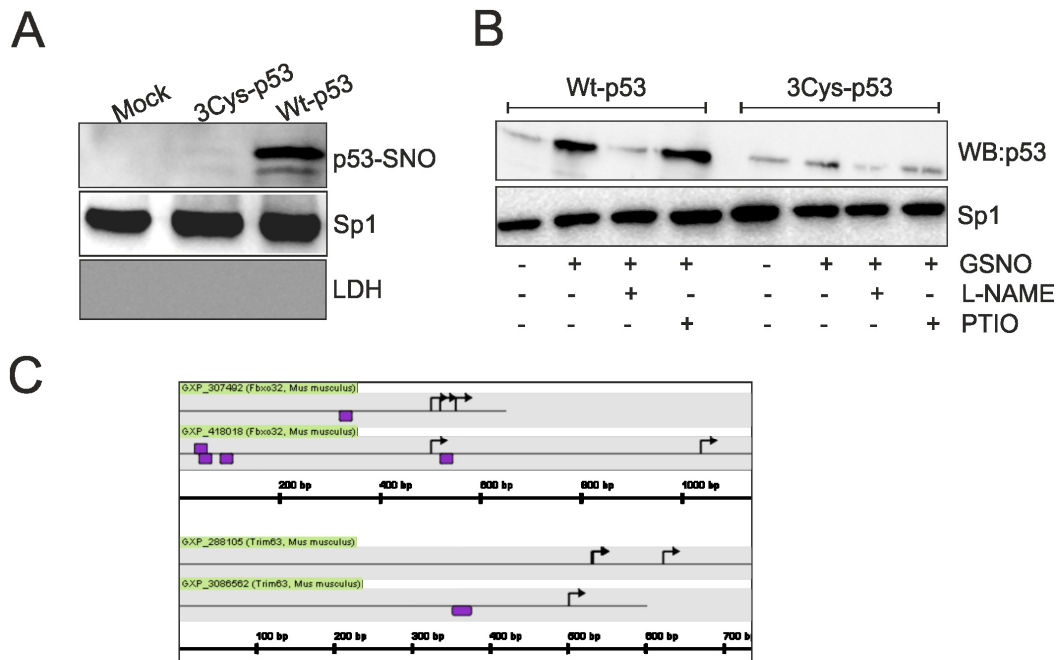

**Supplementary Figure S2. 3Cys-p53 mutant not bind the p53RE on *ppargc1a* promoter.** (A) C2C12 myoblasts were transfected with pcDNA3.1 vector containing cDNA for wild type p53 (Wt-p53), triple p53 mutant in DBD (C277S, C275S and C124S) (3Cys-p53) or with empty vector (Mock). After 15 h from transfection myoblasts were treated with 1 mM BSO for 24 h. Nuclear proteins (500  $\mu$ g) were subjected to S-NO derivatization with biotin. After Western blot the nitrocellulose was incubated with p53 antibody for detection of p53-SNO. Sp1 was used as loading control. The possible presence of cytoplasmic contaminants was tested by incubating nitrocellulose with rabbit anti-LDH. (B) L-NAME (100  $\mu$ M) was added 1 h before BSO treatment (15 h) and maintained throughout the experiment. Intact nuclei of C2C12 cells were pre-treated with 100  $\mu$ M L-NAME or with 2  $\mu$ M carboxy PTIO (PTIO) for 10 minute and subsequently incubated with 5 mM GSNO at 4°C for 30 minute. Nuclear protein extracts (500  $\mu$ g) were subjected to oligo-pull-down by using the biotinylated oligonucleotide representing the p53RE on the *ppargc1a* promoter and bound p53 was detected by Western blot. Twenty  $\mu$ g of nuclear proteins (input) were used for Western blot analysis of Sp1. (C) Schematic representation of murine Atrogin-1 (Fbox32, *upper*) and MuRF-1 (Trim63, *bottom*) promoters. The black arrows indicate the p53RE identified on Atrogin-1 and MuRF-1 promoters. All the immunoblots reported are from one experiment representative of four that gave similar results.
